# Supplementary material
Source: Springer Nature journal article supplement (https://www.springermedizin.de/resource/supplementary/12891_2011_1340_MOESM2_ESM.pdf/9508168)
Supplement: MOESM2 [file 9508168]

864 hits for using search strategy for lumbar stenosis and exercise.

4522 hits using search strategy for lumbar stenosis and surgery.

review of title and abstract

41 potentially relevant articles

94 potentially relevant articles

removal of duplicates

56 potentially relevant articles

screen of full text versions  
(43 articles excluded)

Hand search of references  
of articles (n=0)

13 articles met inclusion  
and exclusion criteria
